# Supplementary material for: A Panax quinquefolius-Based Preparation Prevents the Impact of 5-FU on Activity/Exploration Behaviors and Not on Cognitive Functions Mitigating Gut Microbiota and Inflammation in Mice
Source: MDPI journal article supplement (doi:10.3390/cancers14184403), 2022-09-10
Supplement: s1 [file s1]

Supplementary tables

# A *Panax quinquefolius*-based preparation prevents the impact of 5-FU on activity/exploration behaviors and not on cognitive functions *via* gut microbiota and inflammation in mice

Renaud Parment, Martine Dubois, Laurence Desrues, Alexandre Mutel, Kléouforo-Paul Dembélé, Nicolas Belin, Laure Tron, Moïse Coëffier, Vincent Compère, Céline Féger, Florence Joly, Pascal Hilber, David Ribet and Hélène Castel

## Supplementary tables

**Table S1.** Primer sequences used to quantify intestinal bacteria.

| Taxon                       | Forward                | Reverse                 | T an <sup>a</sup> | Ref. |
|-----------------------------|------------------------|-------------------------|-------------------|------|
| Archaea                     | GYGCASCAGKCGMGA AW     | TTACCGCGGCKGCTG         | 48.5              | [1]  |
| Eubacteria                  | ACTCCTACGGGAGGCAGCAG   | ATTACCGCGGCTGCTGG       | 60                | [2]  |
| Firmicutes                  | ATGTGGTTTAATTCTGAAGCA  | AGCTGACGACAACCATGCAC    | 51                | [3]  |
| Bacteroidetes               | CATGTGGTTTAATTCTGATGAT | AGCTGACGACAACCATGCAG    | 51                | [3]  |
| Betaproteobacteria          | GGGGAATTTTGGACAATGGG   | ACGCATTTCACTGCTACACG    | 58                | [4]  |
| Gammaproteobacteria         | CMATGCCGCGTGTGTGAA     | ACTCCCCAGGCGGTCDACCTTA  | 54                | [4]  |
| Deltaproteobacteria         | GGTGTAGGAGTGAARTCCGT   | TACGTGTGTAGCCCTRGRC     | 62                | [5]  |
| Verrucomicrobia             | GAATTCTCGGTGTAGCA      | GGCATTGTAGTACGTGTGCA    | 59                | [5]  |
| <i>Lactobacillus</i> spp.   | AGCAGTAGGGAATCTTCCA    | CACCGCTACACATGGAG       | 58                | [6]  |
| <i>L. reuteri</i>           | ACCGAGAACACCGCGTTATTT  | ACCTAAACAATCAAAGATTGTCT | 59                | [6]  |
| <i>L. murinus/animalis</i>  | TCGAACGAACTTCTTTATCACC | CGTTCGCCACTCAACTCTTT    | 60                | [6]  |
| <i>L. johnsonii/gasseri</i> | CACTAGACGCATGTCTAGAG   | AGTCTCTCAACTCGGCTATG    | 60                | [6]  |
| <i>L. acidophilus</i>       | CCTTTCTAAGGAAGCGAAGGAT | AATTCTCTTCTCGGTCGCTCTA  | 58                | [6]  |

Note. <sup>a</sup> : Temperature of annealing

**Table S2.** Summary of the behavioral phenotypes of NaCl vs 5-FU mice treated with placebo, vitamin C or Qiseng®.

| Spontaneous activity and exploration | Variable              | Mean ± SEM                       | t <sub>DF</sub> or Mean rank diff. (r) | P value      |
|--------------------------------------|-----------------------|----------------------------------|----------------------------------------|--------------|
| <i>Open field test</i>               |                       |                                  |                                        |              |
| NaCl/placebo vs. 5-FU/placebo        | Total distance        | 36.66 ± 2.369 vs. 10.79 ± 2.440  | t <sub>60</sub> = 5.237                | ***P < 0.001 |
|                                      | Total time immobile   | 156.8 ± 15.18 vs. 433.2 ± 32.09  | r = -31.61                             | **P = 0.001  |
|                                      | Vertical activity     | 59.64 ± 5.137 vs. 16.75 ± 3.985  | t <sub>60</sub> = 5.704                | ***P < 0.001 |
|                                      | Time in center        | 144.2 ± 16.18 vs. 59.31 ± 14.66  | r = 23.66                              | *P = 0.05    |
|                                      | Distance in center    | 11.99 ± 1.040 vs. 3.323 ± 0.7842 | r = 32.69                              | ***P < 0.001 |
|                                      | Time in periphery     | 455.8 ± 16.18 vs. 540.7 ± 14.66  | r = -23.62                             | *P = 0.05    |
|                                      | Distance in periphery | 20.67 ± 1.693 vs. 7.463 ± 1.773  | t <sub>60</sub> = 4.444                | ***P < 0.001 |
| NaCl/vitamin C vs. 5-FU/vitamin C    | Total distance        | 36.60 ± 2.602 vs. 17.87 ± 4.346  | t <sub>60</sub> = 4.284                | **P = 0.001  |
|                                      | Total time immobile   | 117.8 ± 11.55 vs. 313.2 ± 55.44  | r = -27.70                             | *P = 0.01    |
|                                      | Vertical activity     | 58.60 ± 7.305 vs. 22.36 ± 6.194  | t <sub>60</sub> = 4.604                | ***P < 0.001 |
|                                      | Time in center        | 141.6 ± 11.41 vs. 141.3 ± 40.38  | r = 10.15                              | P > 0.99     |
|                                      | Distance in center    | 13.22 ± 0.8219 vs. 7.411 ± 1.811 | r = 26.49                              | *P = 0.02    |
|                                      | Time in periphery     | 458.4 ± 11.41 vs. 458.7 ± 40.38  | r = -10.20                             | P > 0.99     |
|                                      | Distance in periphery | 23.38 ± 2.235 vs. 10.46 ± 2.817  | t <sub>60</sub> = 4.156                | **P = 0.002  |
| NaCl/Qiseng® vs. 5-FUQiseng®         | Total distance        | 28.71 ± 2.062 vs. 32.91 ± 3.411  | t <sub>60</sub> = 0.9801               | P > 0.99     |
|                                      | Total time immobile   | 205.6 ± 24.22 vs. 169.4 ± 21.94  | r = 7.517                              | P > 0.99     |
|                                      | Vertical activity     | 54.70 ± 4.863 vs. 56.08 ± 5.013  | t <sub>60</sub> = 0.1794               | P > 0.99     |
|                                      | Time in center        | 169 ± 13.80 vs.                  | r = 5.433                              | P > 0.99     |

|                                         |                        |                                       |                   |                                     |
|-----------------------------------------|------------------------|---------------------------------------|-------------------|-------------------------------------|
|                                         |                        | 150.8 ± 12.83                         |                   |                                     |
|                                         | Distance in center     | 10.28 ± 0.6599 vs.<br>11.35 ± 1.196   | $r = -2.067$      | $P > 0.99$                          |
|                                         | Time in periphery      | 431 ± 13.80 vs. 449.2<br>± 12.83      | $r = -5.433$      | $P > 0.99$                          |
|                                         | Distance in periphery  | 18.43 ± 1.557 vs.<br>21.57 ± 2.413    | $t_{60} = 1.028$  | $P > 0.99$                          |
| <b>Actimetry</b>                        |                        |                                       |                   |                                     |
| NaCl/placebo<br>vs.<br>5-FU/placebo     | Activity light phase   | 271.9 ± 18.58 vs.<br>212.7 ± 16.76    | $t_{62} = 2.159$  | $P = 0.48$                          |
|                                         | Activity dark phase    | 1062 ± 42.42 vs.<br>753.3 ± 38.26     | $t_{62} = 5.121$  | <b>***<math>P &lt; 0.001</math></b> |
| NaCl/vitamin C<br>vs.<br>5-FU/vitamin C | Activity light phase   | 273.6 ± 24.62 vs.<br>297.0 ± 26.08    | $t_{62} = 0.8532$ | $P > 0.99$                          |
|                                         | Activity dark phase    | 1038 ± 53.05 vs.<br>814.0 ± 41.97     | $t_{62} = 3.710$  | <b>**<math>P = 0.004</math></b>     |
| NaCl/Qiseng®<br>vs.<br>5-FU/Qiseng®     | Activity light phase   | 260.3 ± 13.43 vs.<br>236.1 ± 12.75    | $t_{62} = 0.8820$ | $P > 0.99$                          |
|                                         | Activity dark phase    | 920.9 ± 34.68 vs.<br>969.7 ± 43.40    | $t_{62} = 0.8089$ | $P > 0.99$                          |
| <b>Light/dark box</b>                   |                        |                                       |                   |                                     |
|                                         | Nb of headdip          | 16.09 ± 1.492 vs.<br>4.917 ± 0.8207   | $t_{61} = 5.563$  | <b>***<math>P &lt; 0.001</math></b> |
| NaCl/placebo<br>vs.<br>5-FU/placebo     | Light zone entries     | 10.55 ± 0.8567 vs.<br>1.000 ± 0.5365  | $r = 33.74$       | <b>***<math>P &lt; 0.001</math></b> |
|                                         | Time in the light zone | 69.06 ± 8.930 vs.<br>4.750 ± 5.866    | $r = 31.78$       | <b>**<math>P = 0.001</math></b>     |
|                                         | Vertical activity      | 2.727 ± 0.8538 vs.<br>0.1667 ± 0.1667 | $r = 20.53$       | $P = 0.12$                          |
|                                         | Nb of headdip          | 17.09 ± 1.729 vs.<br>8.636 ± 1.707    | $t_{61} = 4.121$  | <b>**<math>P = 0.002</math></b>     |
| NaCl/vitamin C<br>vs.<br>5-FU/vitamin C | Light zone entries     | 10.91 ± 1.282 vs.<br>2.545 ± 0.8776   | $r = 27.73$       | <b>*<math>P = 0.01</math></b>       |
|                                         | Time in the light zone | 73.27 ± 8.790 vs.<br>13.31 ± 5.866    | $r = 26.73$       | <b>*<math>P = 0.02</math></b>       |
|                                         | Vertical activity      | 3.909 ± 1.268 vs.<br>0.5455 ± 0.3123  | $r = 20.14$       | $P = 0.16$                          |
| NaCl/Qiseng®<br>vs.                     | Nb of headdip          | 16.70 ± 1.739 vs.<br>15.58 ± 1.090    | $t_{61} = 0.5120$ | $P > 0.99$                          |

|                                         |                                    |                                      |                   |            |
|-----------------------------------------|------------------------------------|--------------------------------------|-------------------|------------|
| 5-FU/Qiseng®                            | Light zone entries                 | 12.60 ± 1.384 vs.<br>9.000 ± 1.723   | $r = 11.69$       | $P > 0.99$ |
|                                         | Time in the light zone             | 109.6 ± 15.66 vs.<br>66.60 ± 16.20   | $r = 13.84$       | $P > 0.99$ |
|                                         | Vertical activity                  | 8.500 ± 2.814 vs.<br>3.833 ± 2.014   | $r = 20.10$       | $P = 0.17$ |
| <b>Anxiety-like behaviors</b>           |                                    |                                      |                   |            |
| <i>Elevated plus maze</i>               |                                    |                                      |                   |            |
| NaCl/placebo<br>vs.<br>5-FU/placebo     | Total distance                     | 5.417 ± 0.5636 vs.<br>3.443 ± 0.4558 | $t_{61} = 2.848$  | $P = 0.09$ |
|                                         | Total time immobile                | 174.8 ± 10.82 vs.<br>215.2 ± 10.97   | $t_{61} = 2.367$  | $P = 0.32$ |
|                                         | SAP                                | 8.818 ± 1.536 vs.<br>5.333 ± 1.003   | $t_{61} = 2.518$  | $P = 0.22$ |
|                                         | Head dips                          | 12.64 ± 1.830 vs.<br>17.38 ± 1.248   | $t_{61} = 1.770$  | $P > 0.99$ |
|                                         | % of time in open arms             | 14.73 ± 2.800 vs.<br>10.17 ± 5.452   | $r = 19.45$       | $P = 0.25$ |
|                                         | % of distance crossed in open arms | 13.55 ± 2.372 vs.<br>10.83 ± 3.774   | $r = 9.235$       | $P > 0.99$ |
| NaCl/vitamin C<br>vs.<br>5-FU/vitamin C | Total distance                     | 4.219 ± 0.4902 vs.<br>3.588 ± 0.4329 | $t_{61} = 0.8909$ | $P > 0.99$ |
|                                         | Total time immobile                | 189.7 ± 15.19 vs.<br>199.7 ± 11.78   | $t_{61} = 0.5691$ | $P > 0.99$ |
|                                         | SAP                                | 3.545 ± 0.6518 vs.<br>3.545 ± 0.8672 | $t_{61} = 0.0$    | $P > 0.99$ |
|                                         | Head dips                          | 7.545 ± 1.479 vs.<br>5.818 ± 1.271   | $t_{61} = 0.8590$ | $P > 0.99$ |
|                                         | % of time in open arms             | 8.364 ± 1.795 vs.<br>9.091 ± 1.979   | $r = -1.227$      | $P > 0.99$ |
|                                         | % of distance crossed in open arms | 10.00 ± 2.212 vs.<br>11.64 ± 2.387   | $r = -2.818$      | $P > 0.99$ |
| NaCl/Qiseng®<br>vs.<br>5-FU/Qiseng®     | Total distance                     | 5.403 ± 0.5909 vs.<br>4.432 ± 0.4556 | $t_{61} = 1.365$  | $P > 0.99$ |
|                                         | Total time immobile                | 187.2 ± 12.27 vs.<br>185 ± 11.93     | $t_{61} = 0.1286$ | $P > 0.99$ |
|                                         | SAP                                | 8.3 ± 1.106 vs.<br>6.917 ± 0.9728    | $t_{61} = 1.035$  | $P > 0.99$ |
|                                         | Head dips                          | 8.3 ± 1.961 vs.                      | $t_{61} = 0.0660$ | $P > 0.99$ |

|                                   |                                       |                                    |                   |            |
|-----------------------------------|---------------------------------------|------------------------------------|-------------------|------------|
|                                   |                                       | 8.167 ± 1.230                      |                   |            |
|                                   | % of time in open arms                | 11.20 ± 3.172 vs.<br>21.50 ± 7.202 | $r = -8.550$      | $P > 0.99$ |
|                                   | % of distance in open arms            | 12.80 ± 3.140 vs.<br>21.92 ± 4.137 | $r = -13.47$      | $P > 0.99$ |
| <b>Anhedonia test</b>             |                                       |                                    |                   |            |
| NaCl/placebo vs. 5-FU/placebo     | Sucrose preference (Day 3 - Week 5)   | 73.27 ± 3.756 vs.<br>64.08 ± 2.569 | $t_{64} = 1.995$  | $P = 0.72$ |
|                                   | Sucrose preference (Day 4 - Week 5)   | 72.18 ± 3.695 vs.<br>66.42 ± 3.220 | $t_{64} = 1.252$  | $P > 0.99$ |
| NaCl/vitamin C vs. 5-FU/vitamin C | Sucrose preference (Day 3 - Week 5)   | 69.42 ± 2.327 vs.<br>72.92 ± 2.190 | $t_{64} = 0.7771$ | $P > 0.99$ |
|                                   | Sucrose preference (Day 4 - Week 5)   | 72 ± 2.579 vs.<br>76.33 ± 2.112    | $t_{64} = 0.9621$ | $P > 0.99$ |
| NaCl/Qiseng® vs. 5-FU/Qiseng®     | Sucrose preference (Day 3 - Week 5)   | 69.36 ± 3.374 vs.<br>65.75 ± 3.512 | $t_{64} = 0.7847$ | $P > 0.99$ |
|                                   | Sucrose preference (Day 4 - Week 5)   | 69.64 ± 3.323 vs.<br>65.83 ± 5.057 | $t_{64} = 0.8258$ | $P > 0.99$ |
| <b>Depressive-like behaviors</b>  |                                       |                                    |                   |            |
| <b>Tail suspension test</b>       |                                       |                                    |                   |            |
| NaCl/placebo vs. 5-FU/placebo     | Immobility duration                   | 180.9 ± 7.503 vs.<br>192.2 ± 12.99 | $r = -10.45$      | $P > 0.99$ |
|                                   | Latency to the first immobile episode | 60.57 ± 7.779 vs.<br>53.77 ± 6.827 | $t_{60} = 0.7075$ | $P > 0.99$ |
| NaCl/vitamin C vs. 5-FU/vitamin C | Immobility duration                   | 192.5 ± 5.810 vs.<br>207.7 ± 7.432 | $r = -8.955$      | $P > 0.99$ |
|                                   | Latency to the first immobile episode | 66.98 ± 5.890 vs.<br>52.01 ± 8.619 | $t_{60} = 1.558$  | $P > 0.99$ |
| NaCl/Qiseng® vs. 5-FU/Qiseng®     | Immobility duration                   | 185.5 ± 7.888 vs.<br>194.9 ± 12.17 | $r = -1.908$      | $P > 0.99$ |
|                                   | Latency to the first immobile episode | 60.87 ± 5.960 vs.<br>59.35 ± 5.163 | $t_{60} = 0.1575$ | $P > 0.99$ |
| <b>Forced swim test</b>           |                                       |                                    |                   |            |
| NaCl/placebo vs. 5-FU/placebo     | Immobility duration                   | 245.5 ± 8.928 vs.<br>241.3 ± 6.072 | $t_{61} = 0.3252$ | $P > 0.99$ |
|                                   | Latency to the first immobile episode | 58.95 ± 11.06 vs.<br>69.02 ± 8.964 | $r = -6.939$      | $P > 0.99$ |
| NaCl/vitamin C vs.                | Immobility duration                   | 238.5 ± 8.312 vs.<br>240.6 ± 12.25 | $t_{61} = 0.1617$ | $P > 0.99$ |

|                     |                                       |                                    |                   |            |
|---------------------|---------------------------------------|------------------------------------|-------------------|------------|
| 5-FU/vitamin C      | Latency to the first immobile episode | 67.82 ± 5.330 vs.<br>89.05 ± 13.36 | $r = -8.955$      | $P > 0.99$ |
| NaCl/Qiseng®        | Immobility duration                   | 221 ± 10.75 vs.<br>226.8 ± 9.910   | $t_{61} = 0.4243$ | $P > 0.99$ |
| vs.<br>5-FU/Qiseng® | Latency to the first immobile episode | 92.13 ± 10.44 vs.<br>81.91 ± 7.029 | $r = 6.575$       | $P > 0.99$ |

### Spatial learning and memory

#### Morris Water Maze

|                           |                            |                                        |                   |                               |
|---------------------------|----------------------------|----------------------------------------|-------------------|-------------------------------|
| <b>Initiation – D8</b>    |                            |                                        |                   |                               |
|                           | Escape latency             | 42.15 ± 3.490 vs.<br>46.19 ± 2.834     | $r = -11.11$      | $P > 0.99$                    |
|                           | Distance                   | 6.196 ± 0.6418 vs.<br>6.863 ± 0.5011   | $r = -10.72$      | $P > 0.99$                    |
|                           | Mean speed                 | 0.1334 ± 0.0099 vs.<br>0.1393 ± 0.0062 | $r = 3.625$       | $P > 0.99$                    |
| <b>Latency (Learning)</b> |                            |                                        |                   |                               |
|                           | Day 9                      | 43.31 ± 3.454 vs.<br>45.31 ± 2.886     | $t_{61} = 0.5139$ | $P > 0.99$                    |
|                           | Day 10                     | 29.38 ± 2.854 vs.<br>42.29 ± 2.685     | $t_{61} = 3.318$  | <b>*<math>P = 0.01</math></b> |
|                           | Day 11                     | 23.42 ± 2.764 vs.<br>31.82 ± 2.811     | $t_{61} = 2.158$  | $P = 0.47$                    |
| NaCl/placebo              | Day 12                     | 10.97 ± 1.253 vs.<br>19.81 ± 2.404     | $t_{61} = 2.270$  | $P = 0.35$                    |
| vs.<br>5-FU/placebo       | <b>Distance (Learning)</b> |                                        |                   |                               |
|                           | Day 9                      | 5.957 ± 0.6114 vs.<br>6.683 ± 0.5303   | $t_{61} = 1.009$  | $P > 0.99$                    |
|                           | Day 10                     | 4.067 ± 0.4789 vs.<br>5.364 ± 0.4497   | $t_{61} = 1.802$  | $P > 0.99$                    |
|                           | Day 11                     | 3.783 ± 0.4677 vs.<br>4.390 ± 0.4178   | $t_{61} = 0.8436$ | $P > 0.99$                    |
|                           | Day 12                     | 1.691 ± 0.2432 vs.<br>2.902 ± 0.4452   | $t_{61} = 1.682$  | $P > 0.99$                    |
| <b>Speed (Learning)</b>   |                            |                                        |                   |                               |
|                           | Day 9                      | 0.1331 ± 0.008 vs.<br>0.1425 ± 0.0057  | $t_{61} = 0.9114$ | $P > 0.99$                    |
|                           | Day 10                     | 0.1366 ± 0.008 vs.<br>0.1245 ± 0.0063  | $t_{61} = 1.185$  | $P > 0.99$                    |
|                           | Day 11                     | 0.1522 ± 0.0086 vs.                    | $t_{61} = 1.445$  | $P > 0.99$                    |

|                                  |                                        |                   |                                     |
|----------------------------------|----------------------------------------|-------------------|-------------------------------------|
|                                  | 0.1374 ± 0.0067                        |                   |                                     |
| Day 12                           | 0.1433 ± 0.0071 vs.<br>0.1405 ± 0.0074 | $t_{61} = 0.2805$ | $P > 0.99$                          |
| <b>Probe test – D12</b>          |                                        |                   |                                     |
| % of time spent in NW quadrant   | 38.45 ± 2.042 vs.<br>37.75 ± 3.119     | $t_{61} = 0.1188$ | $P > 0.99$                          |
| % of distance in the NW quadrant | 38.55 ± 2.345 vs.<br>36.08 ± 2.827     | $t_{61} = 0.4449$ | $P > 0.99$                          |
| <b>Recall – D15</b>              |                                        |                   |                                     |
| Escape latency                   | 11.60 ± 1.769 vs.<br>24.40 ± 2.428     | $r = -75.16$      | <b>***<math>P &lt; 0.001</math></b> |
| Distance                         | 2.036 ± 0.335 vs.<br>4.336 ± 0.5421    | $r = -60.85$      | <b>**<math>P = 0.003</math></b>     |
| Mean speed                       | 0.171 ± 0.007 vs.<br>0.1628 ± 0.008    | $r = 11.49$       | $P > 0.99$                          |
| <b>Flexibility – D16</b>         |                                        |                   |                                     |
| Escape latency                   | 19.18 ± 2.341 vs.<br>31.62 ± 3.078     | $t_{61} = 4.620$  | <b>***<math>P &lt; 0.001</math></b> |
| Distance                         | 3.344 ± 0.4634 vs.<br>5.815 ± 0.7063   | $t_{61} = 4.300$  | <b>***<math>P &lt; 0.001</math></b> |
| Mean speed                       | 0.1676 ± 0.0084 vs.<br>0.1656 ± 0.0077 | $t_{61} = 0.1861$ | $P > 0.99$                          |
| <b>Latency (Learning)</b>        |                                        |                   |                                     |
| Day 17                           | 10.06 ± 1.679 vs.<br>21.70 ± 2.528     | $t_{61} = 4.323$  | <b>***<math>P &lt; 0.001</math></b> |
| Day 18                           | 5.734 ± 0.4429 vs.<br>13.74 ± 1.638    | $t_{61} = 2.975$  | <b>*<math>P = 0.04</math></b>       |
| Day 19                           | 6.089 ± 0.4432 vs.<br>9.021 ± 0.7117   | $t_{61} = 1.090$  | $P > 0.99$                          |
| <b>Distance (Learning)</b>       |                                        |                   |                                     |
| Day 17                           | 1.904 ± 0.3585 vs.<br>3.458 ± 0.4989   | $t_{61} = 2.706$  | $P = 0.10$                          |
| Day 18                           | 1.030 ± 0.0992 vs.<br>2.144 ± 0.2601   | $t_{61} = 1.939$  | $P = 0.79$                          |
| Day 19                           | 1.012 ± 0.1030 vs.<br>1.227 ± 0.1298   | $t_{61} = 0.3741$ | $P > 0.99$                          |
| <b>Speed (Learning)</b>          |                                        |                   |                                     |
| Day 17                           | 0.1756 ± 0.0063 vs.<br>0.1529 ± 0.0078 | $t_{61} = 2.146$  | $P = 0.48$                          |
| Day 18                           | 0.1768 ± 0.0059 vs.                    | $t_{61} = 2.221$  | $P = 0.40$                          |

|                                         |                                   |                                                           |                   |                               |
|-----------------------------------------|-----------------------------------|-----------------------------------------------------------|-------------------|-------------------------------|
|                                         | Day 19                            | 0.1534 ± 0.0062<br>0.1570 ± 0.0085 vs.<br>0.1363 ± 0.0076 | $t_{61} = 1.964$  | $P = 0.75$                    |
| <b>Initiation – D8</b>                  |                                   |                                                           |                   |                               |
|                                         | Escape latency                    | 44.16 ± 2.823 vs.<br>49.66 ± 2.773                        | $r = -22.05$      | $P > 0.99$                    |
|                                         | Distance                          | 6.847 ± 0.5830 vs.<br>7.223 ± 0.5311                      | $r = -6.955$      | $P > 0.99$                    |
|                                         | Mean speed                        | 0.1579 ± 0.0078 vs.<br>0.1437 ± 0.0064                    | $r = 28.55$       | $P > 0.99$                    |
| <b>Latency (Learning)</b>               |                                   |                                                           |                   |                               |
|                                         | Day 9                             | 43.58 ± 2.836 vs.<br>43.31 ± 2.798                        | $t_{61} = 0.0680$ | $P > 0.99$                    |
|                                         | Day 10                            | 29.43 ± 2.854 vs.<br>42.36 ± 2.980                        | $t_{61} = 3.332$  | <b>*<math>P = 0.02</math></b> |
|                                         | Day 11                            | 21.94 ± 2.658 vs.<br>30.12 ± 2.930                        | $t_{61} = 2.058$  | $P = 0.60$                    |
|                                         | Day 12                            | 15.15 ± 2.555 vs.<br>22.45 ± 2.425                        | $t_{61} = 1.836$  | $P > 0.99$                    |
| <b>Distance (Learning)</b>              |                                   |                                                           |                   |                               |
| NaCl/vitamin C<br>vs.<br>5-FU/vitamin C | Day 9                             | 7.803 ± 0.5633 vs.<br>7.224 ± 0.5731                      | $t_{61} = 0.7870$ | $P > 0.99$                    |
|                                         | Day 10                            | 5.105 ± 0.5714 vs.<br>6.816 ± 0.6045                      | $t_{61} = 2.327$  | $P = 0.30$                    |
|                                         | Day 11                            | 4.043 ± 0.5981 vs.<br>5.469 ± 0.6622                      | $t_{61} = 1.939$  | $P = 0.79$                    |
|                                         | Day 12                            | 2.935 ± 0.5841 vs.<br>3.931 ± 0.5236                      | $t_{61} = 1.354$  | $P > 0.99$                    |
|                                         | <b>Speed (Learning)</b>           |                                                           |                   |                               |
|                                         | Day 9                             | 0.1744 ± 0.0057 vs.<br>0.1581 ± 0.0063                    | $t_{61} = 2.635$  | $P > 0.99$                    |
|                                         | Day 10                            | 0.1665 ± 0.0061 vs.<br>0.1517 ± 0.0063                    | $t_{61} = 1.410$  | $P > 0.99$                    |
|                                         | Day 11                            | 0.1623 ± 0.0070 vs.<br>0.1596 ± 0.0088                    | $t_{61} = 0.2641$ | $P > 0.99$                    |
|                                         | Day 12                            | 0.1612 ± 0.0076 vs.<br>0.1552 ± 0.0087                    | $t_{61} = 0.5738$ | $P > 0.99$                    |
| <b>Probe test – D12</b>                 |                                   |                                                           |                   |                               |
|                                         | % of time spent in<br>NW quadrant | 32.00 ± 4.936 vs.<br>24.91 ± 2.937                        | $t_{61} = 1.171$  | $P > 0.99$                    |



|                     |                                  |                                         |                   |                                     |
|---------------------|----------------------------------|-----------------------------------------|-------------------|-------------------------------------|
|                     | % of distance in the NW quadrant | 30.55 ± 4.559 vs.<br>25.18 ± 2.600      | $t_{61} = 0.9489$ | $P > 0.99$                          |
|                     | <b>Recall – D15</b>              |                                         |                   |                                     |
|                     | Escape latency                   | 12.25 ± 1.692 vs.<br>25.64 ± 2.577      | $r = -70.26$      | <b>***<math>P &lt; 0.001</math></b> |
|                     | Distance                         | 2.391 ± 0.397 vs.<br>4.929 ± 0.6204     | $r = -61.23$      | <b>**<math>P = 0.003</math></b>     |
|                     | Mean speed                       | 0.171 ± 0.007 vs.<br>0.1763 ± 0.0072    | $r = -4.943$      | $P > 0.99$                          |
|                     | <b>Flexibility – D16</b>         |                                         |                   |                                     |
|                     | Escape latency                   | 17.43 ± 1.886 vs.<br>28.06 ± 2.754      | $t_{61} = 3.867$  | <b>**<math>P = 0.002</math></b>     |
|                     | Distance                         | 3.140 ± 0.4274 vs.<br>5.308 ± 0.7630    | $t_{61} = 3.696$  | <b>**<math>P = 0.003</math></b>     |
|                     | Mean speed                       | 0.1631 ± 0.0082 vs.<br>0.1592 ± 0.01031 | $t_{61} = 0.3625$ | $P > 0.99$                          |
|                     | <b>Latency (Learning)</b>        |                                         |                   |                                     |
|                     | Day 17                           | 9.614 ± 0.9765 vs.<br>21.78 ± 2.851     | $t_{61} = 4.425$  | <b>***<math>P &lt; 0.001</math></b> |
|                     | Day 18                           | 7.057 ± 0.6315 vs.<br>13.94 ± 2.166     | $t_{61} = 2.505$  | $P = 0.19$                          |
|                     | Day 19                           | 5.948 ± 0.4221 vs.<br>9.373 ± 0.9790    | $t_{61} = 1.246$  | $P > 0.99$                          |
|                     | <b>Distance (Learning)</b>       |                                         |                   |                                     |
|                     | Day 17                           | 1.782 ± 0.2158 vs.<br>3.406 ± 0.5729    | $t_{61} = 2.767$  | $P = 0.09$                          |
|                     | Day 18                           | 1.190 ± 0.1304 vs.<br>2.167 ± 0.3700    | $t_{61} = 1.664$  | $P > 0.99$                          |
|                     | Day 19                           | 0.9513 ± 0.1006 vs.<br>1.215 ± 0.1290   | $t_{61} = 0.4488$ | $P > 0.99$                          |
|                     | <b>Speed (Learning)</b>          |                                         |                   |                                     |
|                     | Day 17                           | 0.1720 ± 0.0059 vs.<br>0.1502 ± 0.0090  | $t_{61} = 2.026$  | $P = 0.65$                          |
|                     | Day 18                           | 0.1589 ± 0.0071 vs.<br>0.1503 ± 0.0060  | $t_{61} = 0.7904$ | $P > 0.99$                          |
|                     | Day 19                           | 0.1465 ± 0.0070 vs.<br>0.1307 ± 0.0051  | $t_{61} = 1.467$  | $P > 0.99$                          |
| <hr/>               |                                  |                                         |                   |                                     |
| NaCl/Qiseng®<br>vs. | <b>Initiation – D8</b>           |                                         |                   |                                     |
|                     | Escape latency                   | 39.85 ± 3.696 vs.<br>40.61 ± 3.548      | $r = -8.685$      | $P > 0.99$                          |

|              |                                  |                                        |                   |                                     |
|--------------|----------------------------------|----------------------------------------|-------------------|-------------------------------------|
| 5-FU/Qiseng® | Distance                         | 5.996 ± 0.6525 vs.<br>3.118 ± 0.6588   | $r = -4.721$      | $P > 0.99$                          |
|              | Mean speed                       | 0.1313 ± 0.0089 vs.<br>0.1330 ± 0.0088 | $r = -8.296$      | $P > 0.99$                          |
|              | <b>Latency (Learning)</b>        |                                        |                   |                                     |
|              | Day 9                            | 33.65 ± 3.395 vs.<br>44.87 ± 2.897     | $t_{61} = 2.808$  | $P = 0.08$                          |
|              | Day 10                           | 23.57 ± 2.861 vs.<br>42.20 ± 2.945     | $t_{61} = 4.715$  | <b>***<math>P &lt; 0.001</math></b> |
|              | Day 11                           | 18.54 ± 2.408 vs.<br>29.53 ± 3.318     | $t_{61} = 2.753$  | $P = 0.09$                          |
|              | Day 12                           | 11.36 ± 1.770 vs.<br>21.39 ± 2.876     | $t_{61} = 2.512$  | $P = 0.18$                          |
|              | <b>Distance (Learning)</b>       |                                        |                   |                                     |
|              | Day 9                            | 4.575 ± 0.5722 vs.<br>6.755 ± 0.5277   | $t_{61} = 2.953$  | <b>*<math>P = 0.05</math></b>       |
|              | Day 10                           | 3.307 ± 0.4339 vs.<br>6.219 ± 0.4770   | $t_{61} = 3.944$  | <b>**<math>P = 0.001</math></b>     |
|              | Day 11                           | 2.612 ± 0.404 vs.<br>4.710 ± 0.6184    | $t_{61} = 2.842$  | $P = 0.07$                          |
|              | Day 12                           | 1.903 ± 0.3973 vs.<br>2.919 ± 0.3955   | $t_{61} = 1.375$  | $P > 0.99$                          |
|              | <b>Speed (Learning)</b>          |                                        |                   |                                     |
|              | Day 9                            | 0.1360 ± 0.0079 vs.<br>0.1473 ± 0.0079 | $t_{61} = 1.076$  | $P > 0.99$                          |
|              | Day 10                           | 0.1388 ± 0.0062 vs.<br>0.1469 ± 0.0064 | $t_{61} = 0.7748$ | $P > 0.99$                          |
|              | Day 11                           | 0.1350 ± 0.0081 vs.<br>0.1513 ± 0.0081 | $t_{61} = 1.548$  | $P > 0.99$                          |
|              | Day 12                           | 0.1466 ± 0.0080 vs.<br>0.1424 ± 0.0083 | $t_{61} = 0.4032$ | $P > 0.99$                          |
|              | <b>Probe test – D12</b>          |                                        |                   |                                     |
|              | % of time spent in NW quadrant   | 42.70 ± 4.856 vs.<br>30.67 ± 6.039     | $t_{61} = 1.978$  | $P = 0.79$                          |
|              | % of distance in the NW quadrant | 41.90 ± 4.743 vs.<br>30.58 ± 5.508     | $t_{61} = 0.1994$ | $P = 0.76$                          |
|              | <b>Recall – D15</b>              |                                        |                   |                                     |
|              | Escape latency                   | 6.488 ± 0.7373 vs.<br>21.07 ± 2.550    | $r = -87.18$      | <b>***<math>P &lt; 0.001</math></b> |

|                            |                                        |                   |                 |
|----------------------------|----------------------------------------|-------------------|-----------------|
| Distance                   | 1.045 ± 0.15 vs.<br>2.913 ± 0.333      | $r = -73.16$      | *** $P < 0.001$ |
| Mean speed                 | 0.159 ± 0.012 vs.<br>0.1537 ± 0.0089   | $r = -1.069$      | $P > 0.99$      |
| <b>Flexibility – D16</b>   |                                        |                   |                 |
| Escape latency             | 20.18 ± 2.937 vs.<br>31.30 ± 3.095     | $t_{61} = 4.027$  | *** $P < 0.001$ |
| Distance                   | 3.704 ± 0.6476 vs.<br>5.279 ± 0.6550   | $t_{61} = 2.673$  | $P = 0.11$      |
| Mean speed                 | 0.1604 ± 0.0086 vs.<br>0.1624 ± 0.0085 | $t_{61} = 0.1847$ | $P > 0.99$      |
| <b>Latency (Learning)</b>  |                                        |                   |                 |
| Day 17                     | 6.580 ± 0.7246 vs.<br>22.21 ± 2.941    | $t_{61} = 5.661$  | *** $P < 0.001$ |
| Day 18                     | 5.455 ± 0.4858 vs.<br>12.60 ± 1.870    | $t_{61} = 2.588$  | $P = 0.15$      |
| Day 19                     | 4.685 ± 0.3472 vs.<br>7.710 ± 0.6386   | $t_{61} = 1.096$  | $P > 0.99$      |
| <b>Distance (Learning)</b> |                                        |                   |                 |
| Day 17                     | 1.129 ± 0.1614 vs.<br>3.743 ± 0.5717   | $t_{61} = 4.435$  | *** $P < 0.001$ |
| Day 18                     | 0.8950 ± 0.0948 vs.<br>2.014 ± 0.4313  | $t_{61} = 1.899$  | $P = 0.87$      |
| Day 19                     | 0.7647 ± 0.0722 vs.<br>1.113 ± 0.1204  | $t_{61} = 0.5916$ | $P > 0.99$      |
| <b>Speed (Learning)</b>    |                                        |                   |                 |
| Day 17                     | 0.1626 ± 0.0065 vs.<br>0.1664 ± 0.0074 | $t_{61} = 0.3444$ | $P > 0.99$      |
| Day 18                     | 0.1597 ± 0.0075 vs.<br>0.1460 ± 0.0083 | $t_{61} = 1.265$  | $P > 0.99$      |
| Day 19                     | 0.1578 ± 0.0077 vs.<br>0.1381 ± 0.0073 | $t_{61} = 1.819$  | $P > 0.99$      |

Note. Different items were analyzed in the open field test, the actimetry test, the light/dark box test, the elevated plus maze test, the anhedonia test, the tail suspension test, the forced swimming test and the Morris water maze test in controls and 5-FU groups treated with placebo, vitamin C or Qiseng®. Behavioral data are expressed as mean ± SEM ( $n = 10 - 12$ ). When the data followed a normal distribution, one-way or two-way (in case of repeated measures) ANOVA was performed, with a Bonferroni test used for post-hoc analyses (indicated as  $t$  followed by  $P$  value). In the absence of normal data distribution, a non parametric Kruskal-Wallis test was performed, with a Dunn's test for post-hoc analyses (indicated as  $r$  followed by  $P$  value). 5-FU: 5-fluorouracil.

**Table S3.** Impact of chemotherapy injection on plasma pro-inflammatory, pluripotent, chemotactic and leukocyte growth cytokines.

|                                   |                | placebo<br>NaCl vs. 5-FU              | vitamin C<br>NaCl vs. 5-FU            | Qiseng®<br>NaCl vs. 5-FU              |
|-----------------------------------|----------------|---------------------------------------|---------------------------------------|---------------------------------------|
| <b>Proinflammatory cytokines</b>  |                |                                       |                                       |                                       |
| IL-1 $\alpha$                     | Mean $\pm$ SEM | 40.8 $\pm$ 10.96 vs. 25.83 $\pm$ 10.5 | 40.93 $\pm$ 5.59 vs. 18.16 $\pm$ 3.78 | 28.34 $\pm$ 6.62 vs. 30.28 $\pm$ 6.32 |
|                                   | P. value       | ns. (P = 0.07)                        | <b>**P = 0.001</b>                    | ns.                                   |
| IL-1 $\beta$                      | Mean $\pm$ SEM | 3.84 $\pm$ 0.85 vs. 4.66 $\pm$ 0.51   | 2.52 $\pm$ 0.15 vs. 3.13 $\pm$ 0.36   | 3.38 $\pm$ 0.66 vs. 3.5 $\pm$ 0.54    |
|                                   | P. value       | ns. (P = 0.06)                        | ns. (P = 0.05)                        | ns.                                   |
| IL-12p70                          | Mean $\pm$ SEM | 8.21 $\pm$ 3.19 vs. 15.29 $\pm$ 2.77  | 4.54 $\pm$ 1.44 vs. 3.39 $\pm$ 0.90   | 8.18 $\pm$ 1.99 vs. 8.71 $\pm$ 2.1    |
|                                   | P. value       | <b>*P = 0.03</b>                      | ns.                                   | ns.                                   |
| TNF $\alpha$                      | Mean $\pm$ SEM | 1.53 $\pm$ 0.80 vs. 4.37 $\pm$ 1.33   | 0.52 $\pm$ 0.25 vs. 0.85 $\pm$ 0.39   | 1.39 $\pm$ 0.42 vs. 1.54 $\pm$ 0.45   |
|                                   | P. value       | <b>**P = 0.009</b>                    | ns.                                   | ns.                                   |
| <b>Pluripotent cytokines</b>      |                |                                       |                                       |                                       |
| IL-2                              | Mean $\pm$ SEM | 7.19 $\pm$ 1.39 vs. 22.82 $\pm$ 7.5   | 6.3 $\pm$ 0.6 vs. 5.71 $\pm$ 0.16     | 7.0 $\pm$ 0.77 vs. 6.8 $\pm$ 0.45     |
|                                   | P. value       | <b>*P = 0.04</b>                      | ns.                                   | ns.                                   |
| IL-4                              | Mean $\pm$ SEM | 5.21 $\pm$ 1.17 vs. 8.26 $\pm$ 1.14   | 4.08 $\pm$ 0.37 vs. 7.71 $\pm$ 3.28   | 5.29 $\pm$ 0.68 vs. 5.32 $\pm$ 0.61   |
|                                   | P. value       | <b>**P = 0.001</b>                    | ns. (P = 0.07)                        | ns.                                   |
| IL-6                              | Mean $\pm$ SEM | 9.91 $\pm$ 1.71 vs. 36.31 $\pm$ 7.42  | 9.78 $\pm$ 1.22 vs. 30.0 $\pm$ 16.48  | 12.62 $\pm$ 2.78 vs. 12.57 $\pm$ 1.68 |
|                                   | P. value       | <b>***P &lt; 0.001</b>                | <b>*P = 0.02</b>                      | ns.                                   |
| IL-17                             | Mean $\pm$ SEM | 8.13 $\pm$ 1.57 vs. 27.95 $\pm$ 7.16  | 6.13 $\pm$ 0.38 vs. 14.93 $\pm$ 8.02  | 7.83 $\pm$ 0.79 vs. 8.82 $\pm$ 0.88   |
|                                   | P. value       | <b>***P &lt; 0.001</b>                | ns. (P = 0.06)                        | ns.                                   |
| <b>Chemotactic cytokines</b>      |                |                                       |                                       |                                       |
| MCP-1                             | Mean $\pm$ SEM | 37.16 $\pm$ 3.61 vs. 235 $\pm$ 65.54  | 38.14 $\pm$ 2.06 vs. 142.6 $\pm$ 70.7 | 42.42 $\pm$ 5.3 vs. 61.92 $\pm$ 15.83 |
|                                   | P. value       | <b>***P &lt; 0.001</b>                | <b>***P &lt; 0.001</b>                | ns. (P = 0.08)                        |
| RANTES                            | Mean $\pm$ SEM | 18.29 $\pm$ 2.91 vs. 11.52 $\pm$ 2.78 | 19.52 $\pm$ 2.7 vs. 10.08 $\pm$ 1.13  | 15.64 $\pm$ 2.01 vs. 12.54 $\pm$ 1.52 |
|                                   | P. value       | <b>*P = 0.05</b>                      | <b>*P = 0.02</b>                      | ns.                                   |
| <b>Leukocyte growth cytokines</b> |                |                                       |                                       |                                       |
| IL-3                              | Mean $\pm$ SEM | 4.45 $\pm$ 0.83 vs. 5.17 $\pm$ 0.62   | 3.4 $\pm$ 0.26 vs. 3.28 $\pm$ 0.18    | 4.09 $\pm$ 0.42 vs. 3.8 $\pm$ 0.36    |
|                                   | P. value       | ns. (P = 0.07)                        | ns.                                   | ns.                                   |
| GMCSF                             | Mean $\pm$ SEM | 12.07 $\pm$ 1.77 vs. 18.13 $\pm$ 2.52 | 10.52 $\pm$ 2.22 vs. 15.54 $\pm$ 4.05 | 11.03 $\pm$ 1.95 vs. 12.58 $\pm$ 3.11 |
|                                   | P. value       | ns. (P = 0.06)                        | ns.                                   | ns.                                   |

Note. Quantification of plasmatic cytokines from controls and 5-FU groups, as determined by ELISA. All data are expressed in pg/ml. Data are expressed as mean  $\pm$  SEM ( $n = 6 - 10$ , Mann-Whitney). 5-FU: 5-fluorouracil, GMCSF: Granulocyte Macrophage Colony-Stimulating Factor, IL: Interleukine, MCP-1: Monocyte Chemotactic Protein-1, TNF- $\alpha$ : Tumor Necrosis Factor- $\alpha$ , RANTES: Regulated on Activation Normal T cell Expressed and Secreted.

## References

1. Klindworth, A.; Priesse, E.; Schweer, T.; Peplies, J.; Quast, C.; Horn, M.; Glöckner, F.O. Evaluation of general 16S ribosomal RNA gene PCR primers for classical and next-generation sequencing-based diversity studies. *Nucleic acids research* **2013**, *41*, e1, doi:10.1093/nar/gks808.
2. Fierer, N.; Jackson, J.A.; Vilgalys, R.; Jackson, R.B. Assessment of soil microbial community structure by use of taxon-specific quantitative PCR assays. *Applied and environmental microbiology* **2005**, *71*, 4117–4120, doi:10.1128/aem.71.7.4117-4120.2005.
3. Queipo-Ortuño, M.I.; Seoane, L.M.; Murri, M.; Pardo, M.; Gomez-Zumaquero, J.M.; Cardona, F.; Casanueva, F.; Tinahones, F.J. Gut microbiota composition in male rat models under different nutritional status and physical activity and its association with serum leptin and ghrelin levels. *PLoS One* **2013**, *8*, e65465, doi:10.1371/journal.pone.0065465.
4. Mühling, M.; Woolven-Allen, J.; Murrell, J.C.; Joint, I. Improved group-specific PCR primers for denaturing gradient gel electrophoresis analysis of the genetic diversity of complex microbial communities. *The ISME journal* **2008**, *2*, 379–392, doi:10.1038/ismej.2007.97.
5. Hermann-Bank, M.L.; Skovgaard, K.; Stockmarr, A.; Larsen, N.; Mølbak, L. The Gut Microbiotassay: a high-throughput qPCR approach combinable with next generation sequencing to study gut microbial diversity. *BMC genomics* **2013**, *14*, 788, doi:10.1186/1471-2164-14-788.
6. Bindels, L.B.; Beck, R.; Schakman, O.; Martin, J.C.; De Backer, F.; Sohet, F.M.; Dewulf, E.M.; Pachikian, B.D.; Neyrinck, A.M.; Thissen, J.P.; et al. Restoring specific lactobacilli levels decreases inflammation and muscle atrophy markers in an acute leukemia mouse model. *PLoS One* **2012**, *7*, e37971, doi:10.1371/journal.pone.0037971.
